# Supplementary material
Source: publisher site journal article supplement (https://www.dovepress.com/article/463054)
Supplement: Supplementary file 1 [file get_supplementary_file.php]

**Table S1. Tentatively identified ingredients in QSHT decoction**

| No. | RT [min] | Ion Mode | Molecular weight | Measured mass | Error (ppm) | Formula | Fragments | Name |
| --- | --- | --- | --- | --- | --- | --- | --- | --- |
|  | 1.028 | [M+H]+ | 127.0705 | 127.0503 | 0.68 | C5H7N2O2 | 109.0284 | Thymine |
|  | 1.048 | [M+H]+ | 118.0863 | 118.0863 | 0.13 | C5H11NO2 | 100.0243 | [L-Valin](https://tcmsp-e.com/molecule.php?qn=67) |
|  | 1.203 | [M+H]+ | 213.0678 | 213.0749 | -4.18 | C10H13O5 | 195.0657,169.0520 | Asaronic acid |
|  | 1.227 | [M+H]+ | 151.0753 | 151.0756 | 1.75 | C9H11O2 | 133.1016 | 4'-Hydroxy-3'-methylacetophenone |
|  | 1.728 | [M-H]- | 163.0601 | 163.0601 | -0.06 | C6H11O5 | 145.0128 | 6-Deoxy-gulose |
|  | 1.735 | [M+H]+ | 154.0394 | 155.0342 | 1.77 | C7H7O4 | 127.0155，137.0701 | protocatechuic acid |
|  | 1.777 | [M+H]+ | 135.05449 | 136.0618 | 0.21 | C5H6N5 | 119.0492 | [adenine](https://tcmsp-e.com/molecule.php?qn=1788) |
|  | 1.789 | [M-H]- | 188.0553 | 188.0555 | -2.6 | [C7H10NO5](https://pubchem.ncbi.nlm.nih.gov/#query=C7H11NO5) | 170.0447, 144.0653 | N-ACETYL-D-GLUTAMIC ACID |
|  | 1.824 | [M-H]- | 282.0833 | 282.0841 | 2.89 | C10H12N5O5 | 150.0408 | Guanosin |
|  | 1.831 | [M+H]+ | 181.07421 | 182.0805 | -3.89 | C9 H11 N O3 | 165.0552，147.0440 | L-tyrosine |
|  | 1.94 | [M-H]- | 117.0182 | 117.018 | -1.67 | C4H5O4 | 99.0073，73.0280 | succinic acid |
|  | 1.956 | [M+H]+ | 120.05774 | 121.0648 | 0.24 | C8H8O | 103.0542, 91.0543 | phenylacetaldehyde |
|  | 2.061 | [M+H]+ | 152.0567 | 152.0568 | 0.88 | C5H6N5O | 134.0608，106.0646 | guanine |
|  | 2.149 | [M-H]- | 130.0863 | 130.086 | -2.35 | C6H12NO2 | 86.0315 | Leucinum |
|  | 2.864 | [M-H]- | 143.0339 | 143.0339 | -0.11 | C6H7O4 | 115.0391, 99.0437 | 4H-pyran-4-one,2,3-dihydro-3,5-dihydroxy-6-methyl |
|  | 3.229 | [M+H]+ | 166.0863 | 166.0864 | 0.75 | C9H12NO2 | 136.0752 | Dimethyl anthranilate |
|  | 5.971 | [M+H]+ | 102.0913 | 102.0914 | 0.386 | C5 H11 N O | 84.0808，74.0601 | Valeraldoxim |
|  | 6.064 | [M-H]- | 137.0233 | 137.0231 | -1.24 | C7H5O3 | 108.0201 | protocatechualdehyde |
|  | 6.728 | [M+H]+ | 169.0495 | 169.0495 | -0.149 | C8H9O4 | 141.0546 | Isovanillic acid |
|  | 8.537 | [M+H]+ | 125.0597 | 125.0598 | 0.99 | C7H8O2 | 107.0493 | Guaiacol |
|  | 8.892 | [M-H]- | 119.0577 | 119.0585 | 6.68 | C4H9NO3 | 101.0227 | Threonin |
|  | 10.726 | [M-H]- | 323.1278 | 323.1247 | -9.77 | [C20H20O4](https://pubchem.ncbi.nlm.nih.gov/#query=C20H20O4) | 203.0817,189.0659 | Phaseollinisoflavan |
|  | 10.796 | [M-H]- | 421.1646 | 421.1634 | -2.72 | C25H26O6 | 199.0753 | Glyasperin A |
|  | 10.823 | [M-H]- | 175.0754 | 175.0752 | -0.67 | C11H11O2 | 157.0863 | Cinnamyl acetate |
|  | 10.841 | [M+H]+ | 153.0546 | 153.0547 | 0.65 | C8H8O3 | 135.1166 | vanillin |
|  | 11.633 | [M-H]- | 163.039 | 163.0389 | -0.08 | [C9H7O3](https://pubchem.ncbi.nlm.nih.gov/#query=C9H8O3) | 119.0488 | p-coumaric acid |
|  | 11.809 | [M+H]+ | 180.1019 | 180.1019 | -0.14 | C10H14NO2 | 162.0914,144.0810 | Spantol |
|  | 12.912 | [M-H]- | 447.0933 | 447.093 | 1.93 | C21H19O11 | 285.0401 | Kaempferol 3-O-glucoside |
|  | 12.914 | [M+H]+ | 235.1693 | 235.1692 | -0.37 | C15H23O2 | 217.1587，189.1637 | (1S,10S,E)-6,10-dimethyl-3-(propan-2-ylidene)-11-oxabicyclo[8.1.0]undec-6-en-4-one |
|  | 12.98 | [M-H]- | 191.0339 | 191.0339 | 0.29 | C10 H7 O4 | 173.0078，111.0071 | Scopoletol |
|  | 13.469 | [M-H]- | 193.501 | 193.0497 | -2.25 | [C10H9O4](https://pubchem.ncbi.nlm.nih.gov/#query=C10H10O4) | 178.0260, 134.0359 | Dimethyl phthalate |
|  | 13.867 | [M+H]+ | 225.1121 | 225.1121 | 0.02 | C12 H16 O4 | 207.0653, 175.0390 | Acoramone |
|  | 16.603 | [M-H]- | 161.0597 | 161.0595 | -1.22 | C10H9O2 | 131.0336 | Safrol |
|  | 16.845 | [M-H]- | 313.0707 | 313.0715 | 2.67 | C17H13O6 | 267.1605，249.1490 | Odoratin |
|  | 16.896 | [M-H]- | 313.0707 | 313.0713 | 2 | C17H13O6 | 133.0126, 191.0191 | Jaranol |
|  | 17.239 | [M-H]- | 339.1227 | 339.1232 | 1.47 | [C20H19O5](https://pubchem.ncbi.nlm.nih.gov/#query=C20H20O5) | 207.0866 | Licocoumarone |
|  | 17.444 | [M+H]+ | 273.0757 | 273.0757 | -0.26 | C15 H13 O5 | 153.0182, 147.0441 | naringenin |
|  | 17.732 | [M+H]+ | 250.09996 | 251.16425 | 0.12 | C15H22O3 | 233.15302, 215.1432 | Aerugidiol |
|  | 18.551 | [M+H]+ | 183.0804 | 183.0782 | -11.92 | C13H10O | 165.0912 | Atractylodin* |
|  | 19.154 | [M+H]+ | 235.1693 | 235.1693 | 0.1 | C15 H22 O2 | 217.1586，189.1637，175.1118 | curcumalactone |
|  | 19.929 | [M+H]+ | 232.1466 | 233.1539 | -1.01 | C15H21O2 | 215.1429，175.1119 | [Atractylenolide II](https://www.chemsrc.com/en/cas/73069-14-4_895725.html) |
|  | 22.75 | [M-H]- | 255.0652 | 255.066 | -3.04 | C15H11O4 | 153.0180，135.0074 | (2R)-7-hydroxy-2-(4-hydroxyphenyl)chroman-4-one |
|  | 22.771 | [M+H]+ | 257.0808 | 257.0806 | -0.8 | C15 H13 O4 | 239.0701，211.0754 | (2R)-7-hydroxy-2-(4-hydroxyphenyl)chroman-4-one |
|  | 23.99 | [M-H]- | 315.1591 | 315.1599 | 2.52 | C19H23O4 | 297.1490，279.1393，149.0595 | Atractyloyne |
|  | 30.441 | [M-H]- | 269.045 | 269.0451 | 0.53 | [C15H9O5](https://pubchem.ncbi.nlm.nih.gov/#query=C15H10O5) | 225.1487，251.1292 | baicalein |
|  | 34.614 | [M+H]+ | 235.1693 | 235.1692 | -0.07 | C15H23O2 | 217.1587,199.14806, 189.1636 | isocurcumenol |
|  | 39.402 | [M+H]+ | 235.1693 | 235.1693 | 0.06 | C15H23O2 | 217.1586, 199.14818,179.10690 | [curcumol](https://tcmsp-e.com/molecule.php?qn=902)* |
|  | 39.898 | [M+H]+ | 405.1544 | 405.1544 | 0.08 | C21H25O8 | 390.1300，241.0706 | Citromitin |
|  | 40.214 | [M+H]+ | 403.1393 | 403.1388 | -0.04 | C21H23O8 | 388.1146, 373.0913，355.0802 | Nobiletin* |
|  | 40.241 | [M+H]+ | 283.0964 | 283.0879 | -30.25 | C17H15O4 | 252.5602 | Daidzein dimethyl ether |
|  | 40.867 | [M+H]+ | 209.1172 | 209.1173 | 0.33 | C12 H17 O3 | 191.1064, 173.0963 | beta-Asarone* |
|  | 40.945 | [M+H]+ | 271.0965 | 271.0966 | 0.28 | [C16H15O4](https://pubchem.ncbi.nlm.nih.gov/#query=C16H14O4) | 243.1018, 225.0913 | Medicarpin |
|  | 41.055 | [M+H]+ | 235.1693 | 235.16937 | 0.48 | C15 H23 O2 | 217.1591, 177.1275, 161.0961 | Curcumenol |
|  | 41.316 | [M+H]+ | 433.1493 | 433.1494 | 0.3 | [C22H25O9](https://pubchem.ncbi.nlm.nih.gov/#query=C22H24O9) | 418.1254, 403.1022，385.0915 | 3-Methoxynobiletin |
|  | 41.893 | [M+H]+ | 419.1337 | 419.1338 | 0.31 | C21H23O9 | 404.1100, 389.0863 | neoisoliquiritin |
|  | 42.007 | [M+H]+ | 373.1282 | 373.1281 | -0.19 | C20H21O7 | 358.1045, 343.0811 | tangeretin |
|  | 42.2 | [M+H]+ | 387.1438 | 387.1413 | -6.46 | C21H23O7 | 331.1300, | [Eudesmin](https://pubchem.ncbi.nlm.nih.gov/compound/234823) |
|  | 42.66 | [M-H]- | 239.0703 | 239.0709 | 2.47 | C15H11O3 | 195.1379, 154.0629 | Acetylatractylodinol |
|  | 43.1 | [M+H]+ | 255.0652 | 255.0647 | -1.75 | [C15H11O4](https://pubchem.ncbi.nlm.nih.gov/#query=C15H10O4) | 237.0434 | 7,4'-Dihydroxyflavone |
|  | 43.455 | [M+H]+ | 237.1849 | 237.1849 | 0.14 | C15 H25 O2 | 219.1743, 135.1168 | Curdione* |
|  | 44.156 | [M+H]+ | 419.1337 | 419.1336 | -0.12 | C21 H23 O9 | 181.0859 | [neoliquiritin](https://tcmsp-e.com/molecule.php?qn=4940) |
|  | 44.777 | [M-H]- | 265.1229 | 265.1232 | 1.19 | C18H17O2 | 247.1130, 172.0600 | Magnolol* |
|  | 46.143 | [M+H]+ | 283.1329 | 283.1329 | 0.1 | C18H19O3 | 114.0914 | [Obovatol](https://www.ncbi.nlm.nih.gov/pcsubstance/?term=%22Obovatol%22%5bCompleteSynonym%5d%20AND%20100771%5bStandardizedCID%5d) |
|  | 46.382 | [M-H]- | 265.1229 | 265.1231 | 0.85 | C18H17O2 | 247.1121,135.0705 | Honokiol* |
|  | 46.66 | [M+H]+ | 425.1959 | 425.1934 | -5.89 | C25H29O6 | 203.0678 | (2R)-2-[3,4-dihydroxy-5-(3-methylbut-2-enyl)phenyl]-5,7-dihydroxy-8-(3-methylbut-2-enyl)chroman-4-one |
|  | 46.668 | [M+H]+ | 209.1172 | 209.1174 | 0.67 | C12 H17O3 | 191.1064 | alpha-Asarone* |
|  | 47.737 | [M+H]+ | 209.1172 | 209.1173 | 0.47 | C12H17O3 | 194.0934, 191.1064 | [gamma-Asarone](https://tcmsp-e.com/molecule.php?qn=3549) |
|  | 65.001 | [M-H]- | 283.2637 | 283.2637 | 0.087 | C18H35O2 | 265.1475 | Stearic acid |

Note: * The compounds were identified with reference standards

**Table S2. The affinities between the ligands and proteins**

| Protein | PDB ID | ligand | Grid_Score | Grid_vdw_energy | Grid_es_energy |
| --- | --- | --- | --- | --- | --- |
| AKT1 | 7NH5 | {N}-methyl-6-[4-[[4-[2-oxidanylidene-6-(propanoylamino)-3~{H}-benzimidazol-1-yl]piperidin-1-yl]methyl]phenyl]-5-phenyl-pyridine-3-carboxamide | -72.081833 | -68.301346 | -3.78049 |
| TLR4 | 4G8A | **R-((2R,3S,4R,5R,6R)-3-hydroxy-2-(hydroxymethyl)-5-((R)-3-hydroxytetradecanamido)-6-(phosphonooxy)tetrahydro--2h-pyran-4-yl)** | -107.795731 | -67.139351 | -40.65638 |
| NF-κB | 4DN5 | **Phosphothiophosphoric acid-adenylate ester** | -97.547043 | -75.743256 | -21.803789 |
| HIF-1α | 4W9C | **(4R)-1-(3,3-dimethylbutanoyl)-4-hydroxy-N-[4-(1,3-oxazol-5-yl)benzyl]-L-prolinamide** | -61.707184 | -58.04557 | -3.661613 |
| GSK-3β | 7U2Z | **(3R)-1-[3-(2-fluorophenyl)propanoyl]-N-(pyridin-2-yl)pyrrolidine-3-carboxamide** | -57.930653 | -57.133213 | -0.79744 |

**
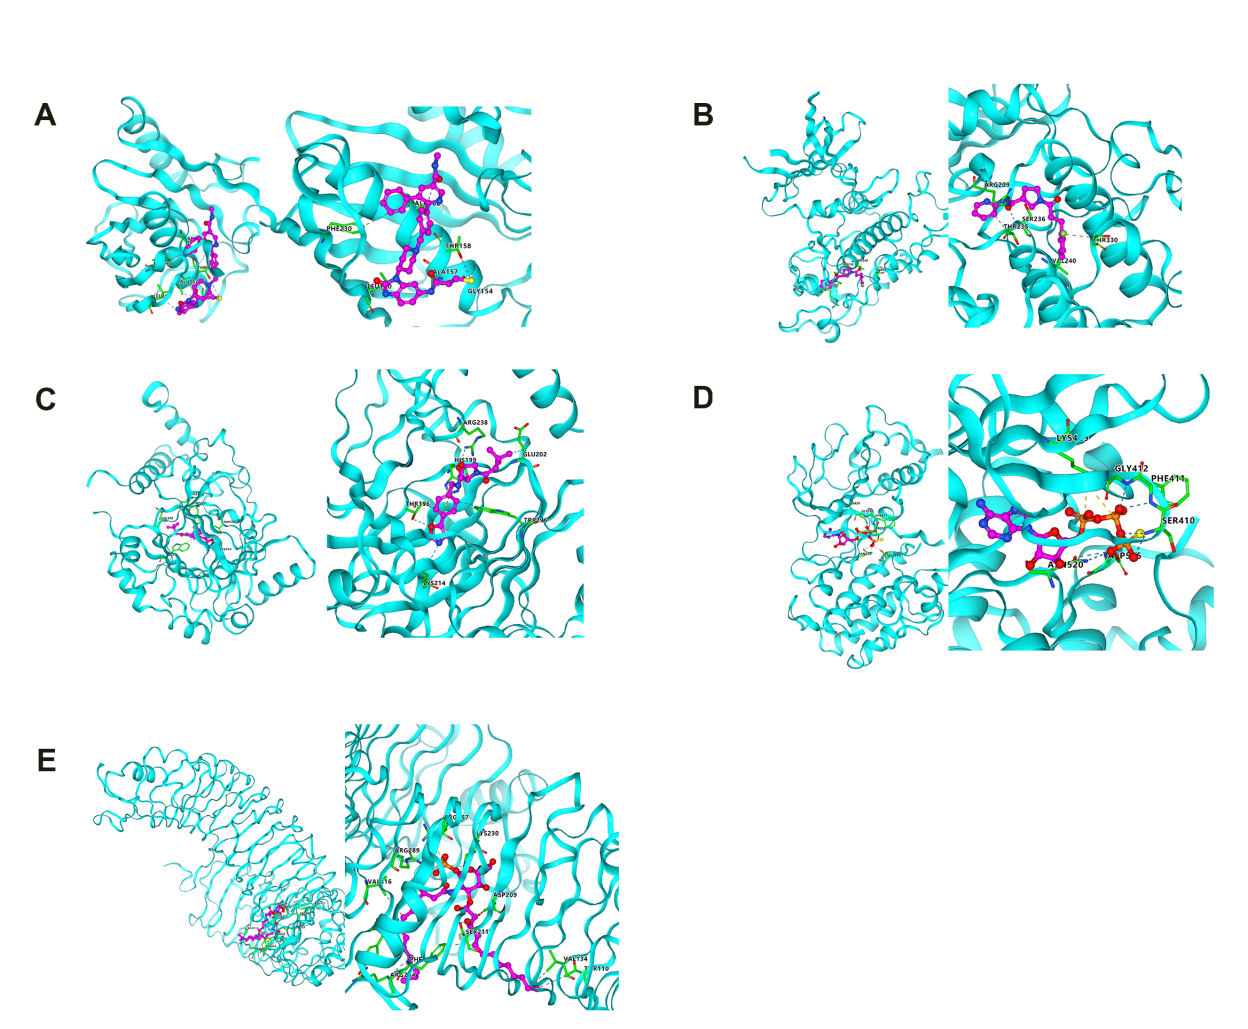
**

Figure S1: Docking patterns of ligand and target proteins. (A) ligand and AKT. (B) ligand and GSK-3β. (C) ligand and HIF-1α. (D) ligand and NF-κB. (E) Atractyloyne and TLR4.
